# Supplementary material for: Color selective manipulation in Li2ZnGe3O8:Mn2+ by multiple-cation substitution on different crystal-sites
Source: Royal Society of Chemistry journal article supplement (doi:10.1039/c7dt04552b), 2018-01-01
Supplement: c7dt04552b1.pdf [file c7dt04552b1.pdf]

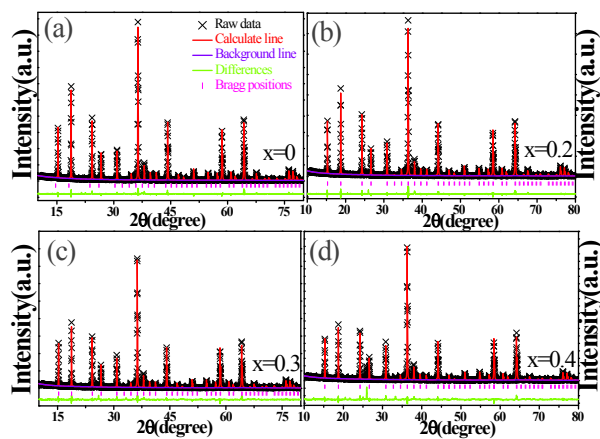

Fig.S1 X-ray Rietveld refinement patterns of  $\text{Li}_{2(1-x)}\text{Zn}_{(1+x)}\text{Ge}_3\text{O}_8:3\%\text{Mn}^{2+}$  ( $x=0-0.4$ ). Observed (black crosses), calculated (red line), and difference profiles are displayed along with expected reflection positions.

Table S1 Crystallographic parameters from X-ray Rietveld refinements of  $\text{Li}_{2(1-x)}\text{Zn}_{1+x}\text{Ge}_3\text{O}_8:3\%\text{Mn}^{2+}$  ( $x = 0, 0.2, 0.3$  and  $0.4$ )

|                                 | $x=0$  | $x=0.2$ | $x=0.3$ | $x=0.4$ |
|---------------------------------|--------|---------|---------|---------|
| Cell parameters                 |        |         |         |         |
| $a/b/c(\text{\AA})$             | 8.172  | 8.199   | 8.202   | 8.205   |
| $\alpha/\beta/\gamma(^{\circ})$ | 90     | 90      | 90      | 90      |
| Volume( $\text{\AA}^3$ )        | 545.78 | 551.12  | 551.67  | 552.36  |
| Reliability factors             |        |         |         |         |
| $R_p(\%)$                       | 5.5    | 6.71    | 7.5     | 9.59    |
| $R_{wp}(\%)$                    | 7.62   | 9.55    | 11.08   | 12.42   |
| $\chi^2$                        | 2.80   | 3.302   | 4.361   | 5.45    |

Table S2 Atomic occupancy of  $\text{Li}_{2(1-x)}\text{Zn}_{1+x}\text{Ge}_3\text{O}_8:3\%\text{Mn}^{2+}$  ( $0 \leq x < 0.5$ )

| Atom | $x=0$ (occupancy) | $x=0.2$ (occupancy) | $x=0.3$ (occupancy) | $x=0.4$ (occupancy) |
|------|-------------------|---------------------|---------------------|---------------------|
| Li1  | 0.6231            | 0.4690              | 0.4198              | 0.3667              |
| Zn1  | 0.3669            | 0.5160              | 0.5632              | 0.6133              |
| Li2  | 0.6727            | 0.8185              | 0.8493              | 0.9031              |
| Zn2  | 0.3073            | 0.1665              | 0.1377              | 0.0869              |
| Ge   | 1.00              | 1.00                | 1.00                | 1.00                |

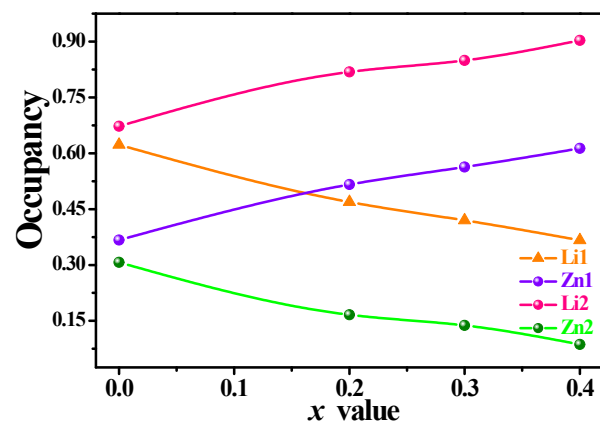

Fig.S2 Structural refinement results for  $\text{Li}_{2(1-x)}\text{Zn}_{1+x}\text{Ge}_3\text{O}_8:3\%\text{Mn}^{2+}$  ( $0 \leq x < 0.5$ ) with the relative changes in the lattice parameters.

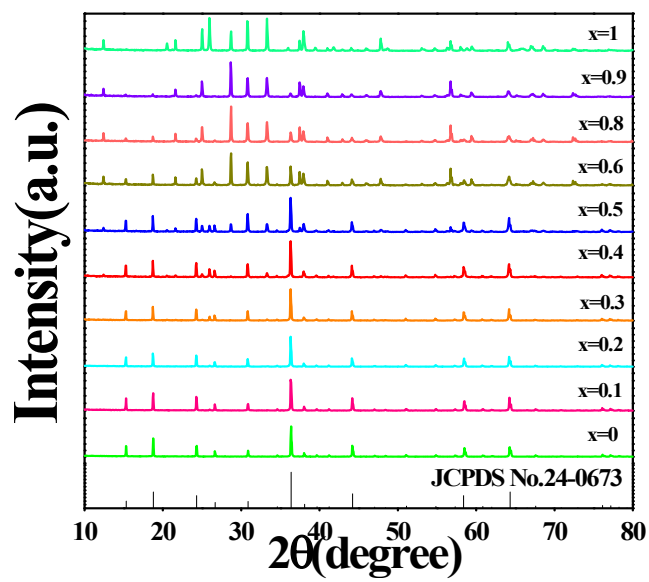

Fig.S3 XRD patterns of  $\text{Li}_{2(1-x)}\text{Zn}_{(1+x)}\text{Ge}_3\text{O}_8:3\%\text{Mn}^{2+}$  ( $0 \leq x \leq 1$ ) heated at  $950^\circ\text{C}$ .

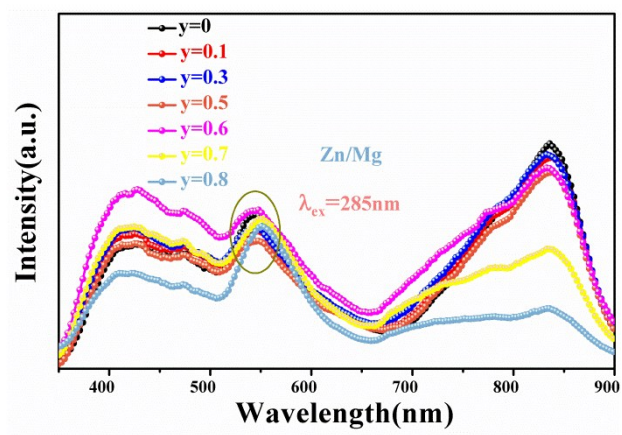

Fig.S4 The PL spectra of  $\text{Li}_2\text{Zn}_{1-y}\text{Mg}_y\text{Ge}_3\text{O}_8:\text{Mn}^{2+}$  under 285nm excited with different Zn/Mg ratios.

Table S3 Crystallographic parameters and atomic occupancy of  $\text{Li}_2\text{Zn}_{1-m}\text{Ba}_m\text{Ge}_3\text{O}_8\cdot 3\%\text{Mn}^{2+}(m=0,0.3)$

| Cell parameters                 | host      | $m=0$     | $m=0.3$   |
|---------------------------------|-----------|-----------|-----------|
| a/b/c(Å)                        | 8.164     | 8.172     | 8.206     |
| $\alpha/\beta/\gamma(^{\circ})$ | 90        | 90        | 90        |
| Volume(Å <sup>3</sup> )         | 544.23    | 545.78    | 552.48    |
| Atom                            | occupancy | occupancy | occupancy |
| Li1                             | 0.667     | 0.667     | 0.667     |
| Zn1                             | 0.333     | 0.325     | 0.183     |
| Li2                             | 0.667     | 0.667     | 0.667     |
| Zn2                             | 0.333     | 0.308     | 0.245     |
| Ge                              | 1         | 1         | 0.986     |
